# Supplementary material for: Significant hydrogen generation via photo-mechanical coupling in flexible methylammonium lead iodide nanowires
Source: Royal Society of Chemistry journal article supplement (doi:10.1039/d3sc05434a), 2024-01-01
Supplement: d3sc05434a1.pdf [file d3sc05434a1.pdf]

## Electronic Supplementary Information (ESI)

### Significant hydrogen generation via photo-mechanical coupling in flexible methylammonium lead iodide nanowires

Yucheng Zhang,<sup>a</sup> Jiawei Huang,<sup>a</sup> Mengya Zhu,<sup>b</sup> Zhouyang Zhang,<sup>b</sup> Kaiqi Nie,<sup>c</sup> Zhiguo Wang,<sup>a</sup> Xiaxia Liao,<sup>a</sup> Longlong Shu,<sup>a</sup> Tingfang Tian,<sup>\*a</sup> Zhao Wang,<sup>\*d</sup> Yang Lu,<sup>e</sup> and Linfeng Fei <sup>\*a</sup>

<sup>a</sup> School of Physics and Materials Science, Nanchang University, Nanchang 330031, China

<sup>b</sup> Department of Mechanical Engineering, City University of Hong Kong, Kowloon, Hong Kong SAR, China

<sup>c</sup> Institute of High Energy Physics, Chinese Academy of Sciences, Beijing 100049, China

<sup>d</sup> Hubei Key Laboratory of Micro-& Nanoelectronic Materials and Devices, School of Microelectronics, Hubei University, Wuhan 430062, China

<sup>e</sup> Department of Mechanical Engineering, The University of Hong Kong, Hong Kong SAR, China

E-mail: [feilinfeng@gmail.com](mailto:feilinfeng@gmail.com) (L. F. Fei); [wangzhao@hubu.edu.cn](mailto:wangzhao@hubu.edu.cn) (Z. Wang);  
[tftian@ncu.edu.cn](mailto:tftian@ncu.edu.cn) (T. F. Tian)

## Contents of Supplementary Information:

|                                              |     |
|----------------------------------------------|-----|
| Methods .....                                | S2  |
| Synthesis of MAPbI <sub>3</sub> NWs .....    | S2  |
| Synthesis of MAPbI <sub>3</sub> NPs.....     | S3  |
| Synthesis of MAPbI <sub>3</sub> SCs .....    | S3  |
| General characterizations .....              | S4  |
| In situ PFM test .....                       | S4  |
| In situ bending test.....                    | S4  |
| Finite element simulations .....             | S5  |
| Hydrogen evolution test .....                | S5  |
| Calculation of the catalytic efficiency..... | S6  |
| Supplementary Figures .....                  | S7  |
| References .....                             | S24 |

## Methods

### Synthesis of MAPbI<sub>3</sub> NWs

461.1 mg PbI<sub>2</sub> powder was added into 1 mL N,N-dimethylformamide (DMF) before the system was heated to 70 °C on a hot plate for 1 h, while in another reactor, 159 mg MAI (C<sub>4</sub>H<sub>6</sub>I<sub>N</sub>) was added into 20 mL isopropyl alcohol (IPA) and vigorously stirred at room temperature for 30 min under an argon atmosphere. After that, the PbI<sub>2</sub> solution was gradually added to the MAI solution. The mixture was vigorously stirred under an atmosphere of argon for 30 minutes; and finally, MAPbI<sub>3</sub> NWs were obtained by centrifuging the mixture.

### Synthesis of MAPbI<sub>3</sub> NPs

MAI and PbI<sub>2</sub> of 1:1 molar ratio were dissolved in DMF in a vial and stirred for 2 hours before the formation of a yellow solution. MAPbI<sub>3</sub> NPs were synthesized by adding the precursor solution drop by drop to toluene. The solvent was then removed at a centrifugal rate of 8000 rpm for 5 minutes. The product was then collected after drying at 70 °C in a vacuum oven.

### Synthesis of MAPbI<sub>3</sub> SCs

2.0 M PbI<sub>2</sub> and 2.0 M MAI were dissolved in a mixed solvent of DMSO–DMF (7:3 by volume; DMSO: dimethyl sulfoxide) in a vial. The precursor solution was then filtered with a polytetrafluoroethylene (PTFE) filter before heating on an oil bath at 70 °C for a period of time in order to produce MAPbI<sub>3</sub> SCs. For example, small SCs (average size about 1.5 μm) can be harvested by maintaining 5 ml precursor solution at this temperature for 5 hours.

## **General characterizations**

XRD patterns were obtained on a Rigaku D/Max diffractometer with a Cu K $\alpha$  radiation. SEM images were obtained on a Thermo Scientific Scios2 dual beam electron microscope operated at 20 kV. TEM images and EDS elemental mappings were obtained on a 300 kV double aberration-corrected Titan Themis Z electron microscope. UPS measurements were conducted in the 4B9B beamline at Beijing Synchrotron Radiation Facility with He I source (21.2 eV). The spectra were collected using a Scienta R4000 spectrometer with an energy resolution better than 0.1 eV. For the work function measurements, all samples were biased at -5 eV to acquire the low cutoff of secondary electron. The photon energy was calibrated by the Au 4f $_{7/2}$  peak with a binding energy of 84 eV. UV-Vis DRS spectra were recorded on a Hitachi UH-4150 UV-Vis spectrophotometer with spectral-grade BaSO $_4$  as a reference.

## **In situ PFM test**

In situ PFM test was performed on a NT-MDT scanning probe microscopy (SPM, NT-MDT Ntegra upright) with a heating stage (SU045NTF, NT-MDT, Russia) which was equipped with a Pt resistor to achieve its temperature stability at 0.05 °C. By moving the probe tip of PFM to the middle region of the scanned NW, the displacement-voltage butterfly curve and the phase curve were obtained upon applying a voltage in a certain range at each temperature.

## **In situ bending test**

A batch of NWs was dispersed in isopropanol by stirring and ultrasonication to get a dilute suspension, which was then drop-casted onto a copper grid. Using the Model 450PM Manual Probe Station platform, an appropriate NW was picked with the help of a light microscopy, which was then experienced a force on one tip by a fine tungsten needle.

### Finite element simulations

Finite element simulations were performed using a COMSOL software. The length of MAPbI<sub>3</sub> NW was set to 30 μm, and the diameter was set to 300 nm. The elastic modulus and Poisson's ratio of the MAPbI<sub>3</sub> NW were set to 20 GPa and 0.4, respectively. The NW was simply supported at both ends, and the axial displacement constraint was set at the bottom to ensure that the NW can bend freely. The bending of the NW was realized by applying bending moments at both ends. The bending moment was set to 10<sup>-12</sup> N m in order to approach the level of strain gradient in our experiments.

### Hydrogen evolution test

First, a saturated HI solution was prepared as follows. An H-shaped cell was employed in this preparation to separate the anode and cathode compartment with a Nafion 117 membrane placed between them. 10 mL of 57 wt% HI solution was added in each compartment. 2.97 g PbI<sub>2</sub> was dissolved in the HI at the cathode compartment and stirred at 60 °C before slowly adding 1.025 g MAI. Carbon fiber papers with an active area of 4 cm<sup>2</sup> were utilized as both the working and counter electrodes. After Ar gas purging into two compartments for 15 min, -800 mA of current was applied on the working electrode for 2 h (**Figure S16**). Thereafter, the saturated hydrogen iodide solution was obtained in the cathode compartment.

Subsequently, the hydrogen production rates were determined from a homemade top-lighting reactor (30 ml; with water cooling). A 300 W Xe-lamp (PLS-SXE 300/300UV, Beijing Perfect Light, China) with a 420 nm cut-off filter was used as a visible light source, and mechanical stimulation was introduced to the reactor by a magnetic stirrer at 300 rpm. Typically, 50 mg MAPbI<sub>3</sub> NWs was dispersed into 5 ml saturated HI solution for a single hydrogen evolution test. The evolved H<sub>2</sub> was

quantitatively analyzed by a gas chromatograph (Shimadzu GC-2014) with Ar as the carrier gas.

### Calculation of the catalytic efficiency

By utilizing the concentration of HI solution and the computed free energy associated with splitting the solution, we can determine the potential energy value, denoted as  $E_{HI}$ , which equals to 0.33 eV. Utilizing this potential energy value, we can evaluate the solar conversion efficiency of our photomechanocatalytic reaction by utilizing the following equation.<sup>1, 2</sup>

$$\text{Solar HI splitting efficiency (\%)} = \frac{\left[ \text{Evolved H}_2 \text{ (mol)} \times 6.02 \times 10^{23} \times 2 \times 0.330 \text{ (eV)} \times 1.6 \times 10^{-19} \right]}{[\text{P}_{\text{sol}} \text{ (W cm}^{-2}) \times \text{Area (cm}^2) \times \text{time (s)}]} \times 100\%$$

For instance, in the case of the MAPbI<sub>3</sub> NWs deposited, 75.65 μmol of H<sub>2</sub> could be generated after 2 h of light irradiance at 100 mW cm<sup>-2</sup>. Because our light irradiation area was 0.25 cm<sup>2</sup>, the solar HI splitting efficiency could be calculated as 2.67%.

Supplementary Figures

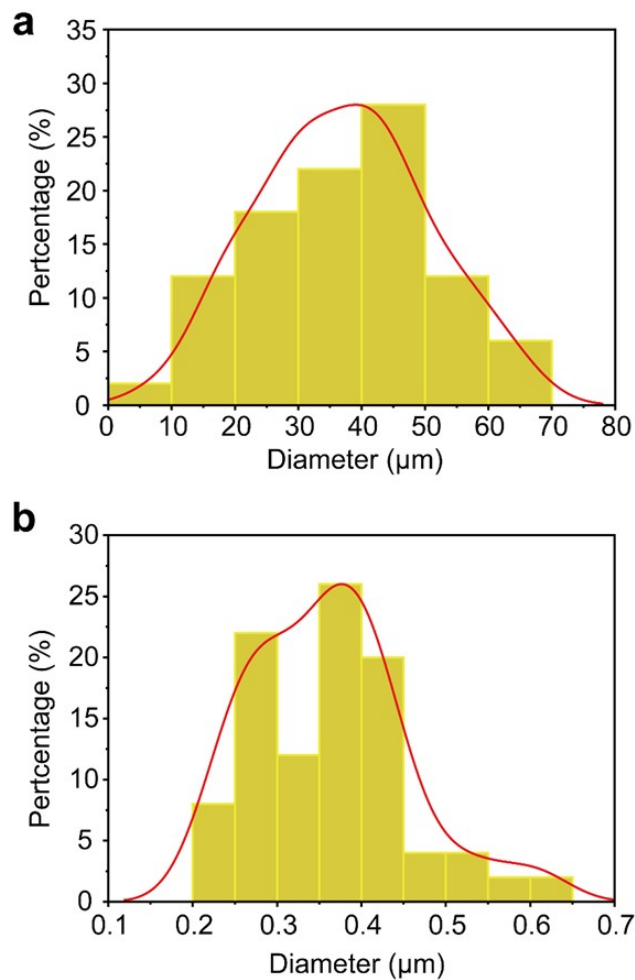

**Fig. S1** Statistics of lengths and diameters for MAPbI<sub>3</sub> NWs. (a) Length statistics of MAPbI<sub>3</sub> NWs. (b) Diameter statistics of MAPbI<sub>3</sub> NWs.

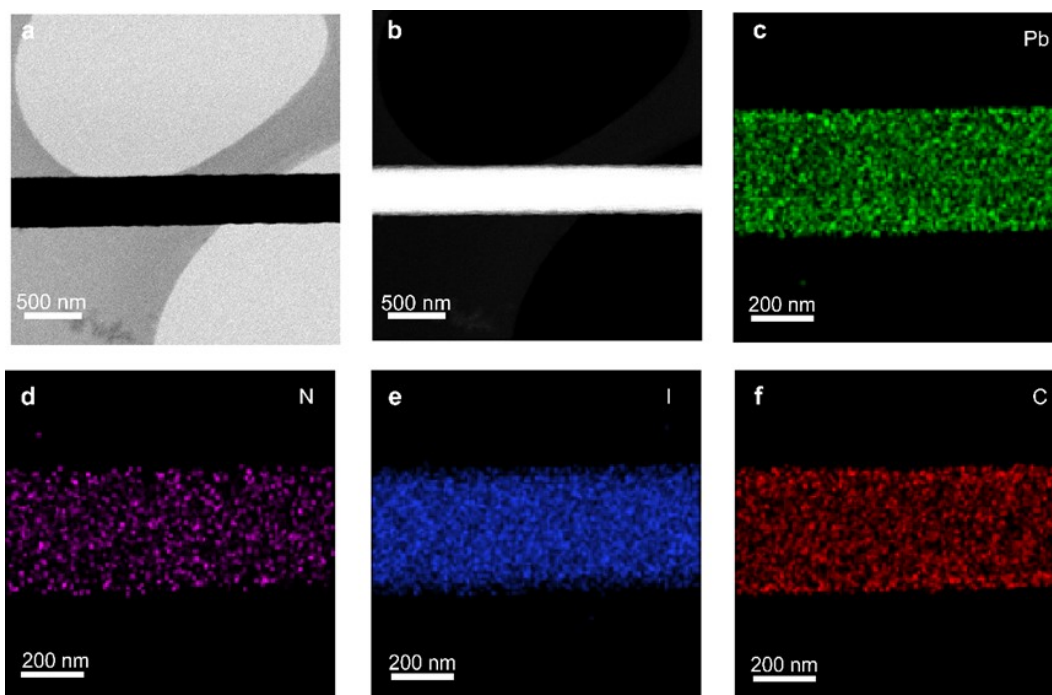

**Fig. S2** Morphological characterization and elemental distributions of MAPbI<sub>3</sub> NWs. (a) TEM image of a NW. (b-f) STEM (i.e., scanning transmission electron microscopy) image and the EDS elemental mappings for Pb, N, I, and C.



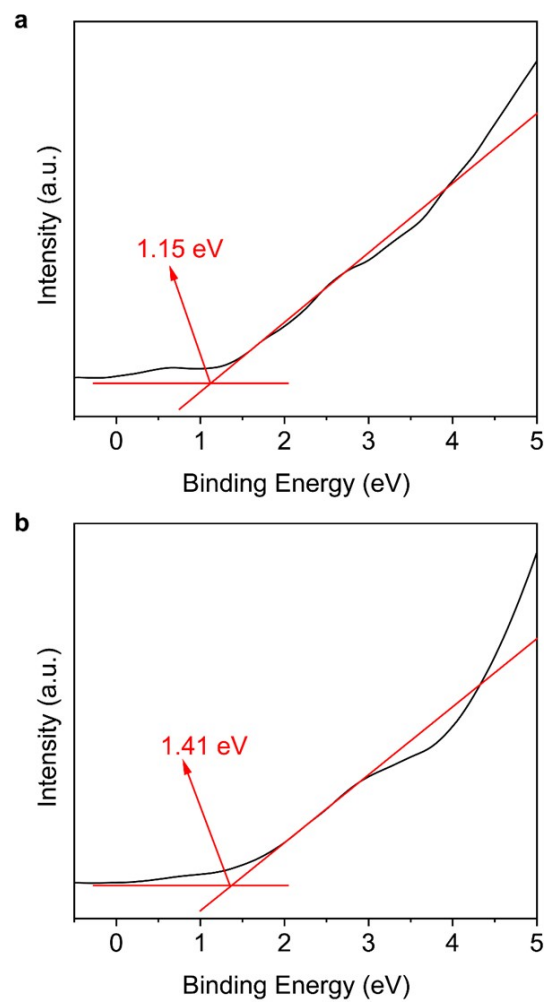

**Fig. S3** UPS characterizations for (a) MAPbI<sub>3</sub> SC and (b) MAPbI<sub>3</sub> NPs.

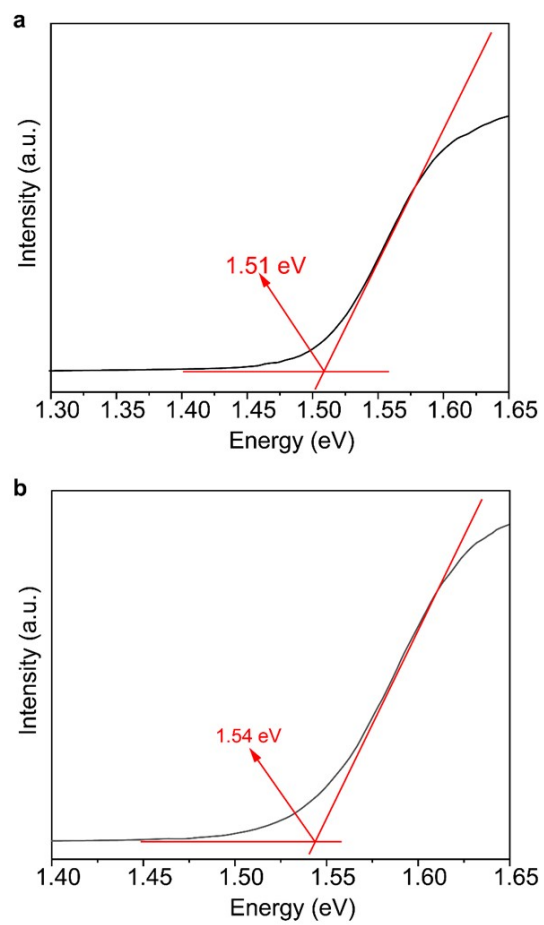

**Fig. S4** Tauc plots for (a) MAPbI<sub>3</sub> SC and (b) MAPbI<sub>3</sub> NPs.

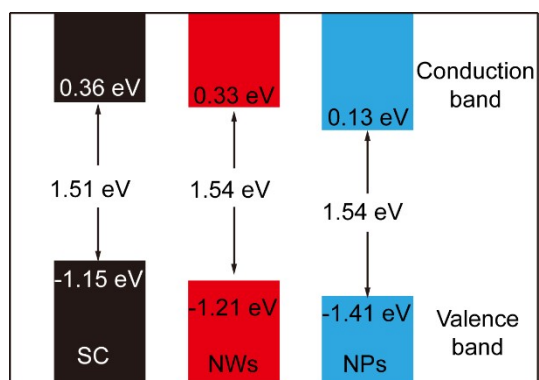

**Fig. S5** Comparison of the structures of optical bandgaps (versus Fermi level) for MAPbI<sub>3</sub> SC, NWs and NPs.

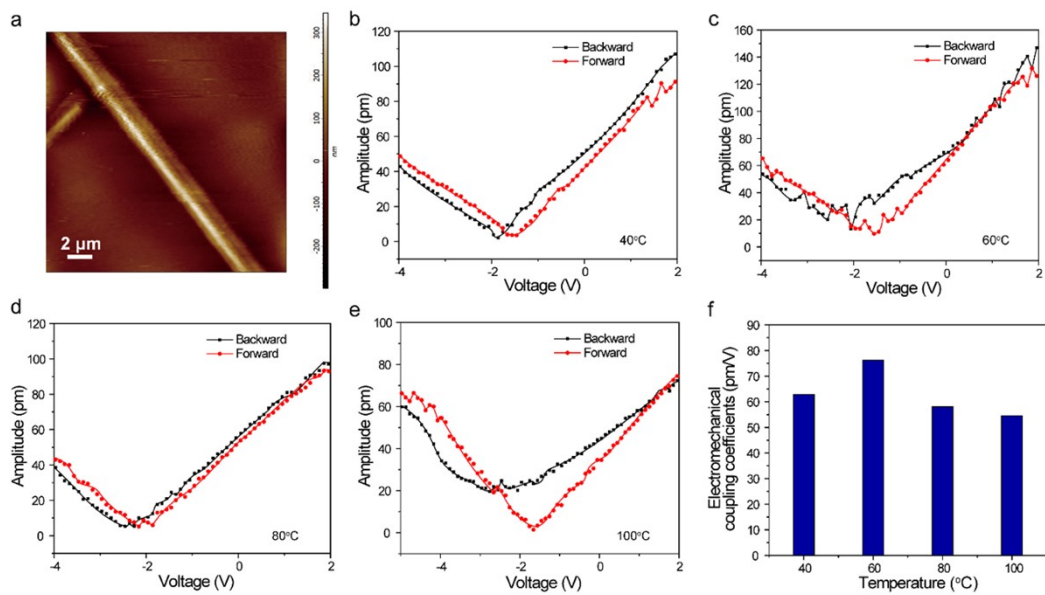

**Fig. S6** In situ PFM response of NWs at a temperature range from RT to 100 °C. (a) The corresponding PFM morphology image for a MAPbI<sub>3</sub> NW. (b) PFM amplitude response for a MAPbI<sub>3</sub> NW at 40 °C. (c) PFM amplitude response for a MAPbI<sub>3</sub> NW at 60 °C. (d) PFM amplitude response for a MAPbI<sub>3</sub> NW at 80 °C. (e) PFM amplitude response for a MAPbI<sub>3</sub> NW at 100 °C. (f) Electromechanical coupling coefficients for the above NW from RT to 100 °C.

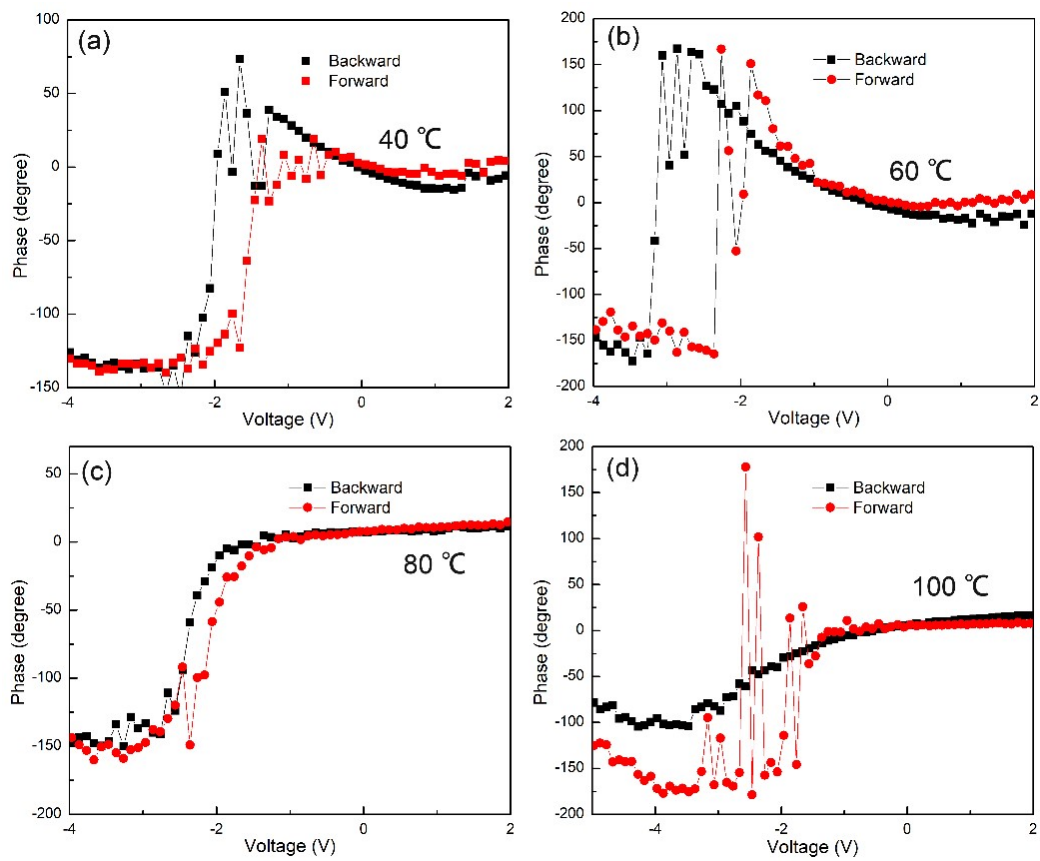

**Fig. S7** The phase-voltage curves of a MAPbI<sub>3</sub> NW tested by PFM at (a) 40 °C, (b) 60 °C, (c) 80 °C, and (d) 100 °C.

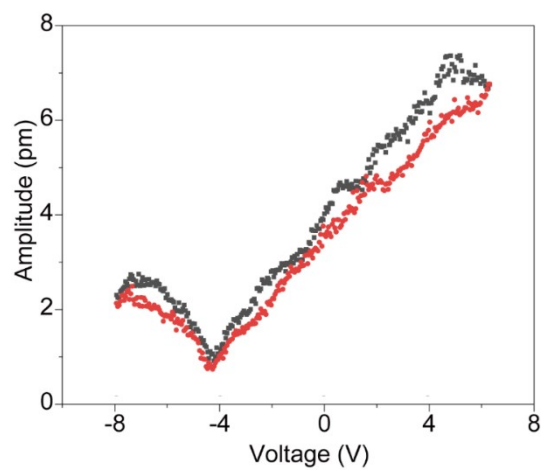

**Fig. S8** PFM amplitude response of a commercial LiNbO<sub>3</sub> sample.

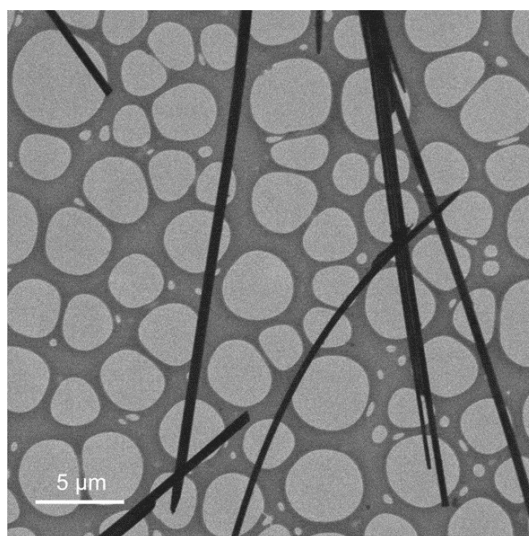

**Fig. S9** Bright-field TEM image for MAPbI<sub>3</sub> NWs, in which the bending NW can be observed.

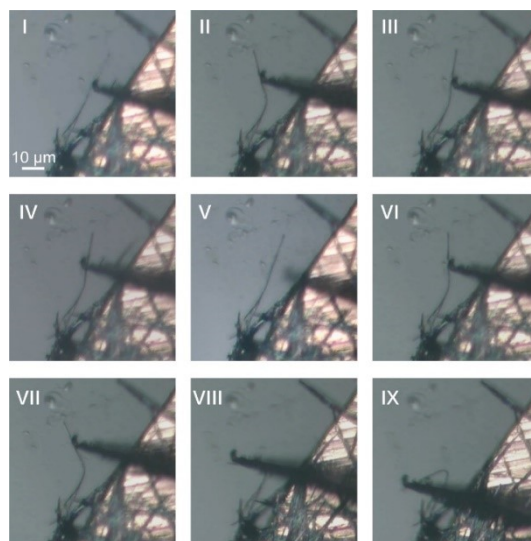

**Fig. S10** Optical image series showing a MAPbI<sub>3</sub> NW experienced multiple bending-recovery processes before it was broken.



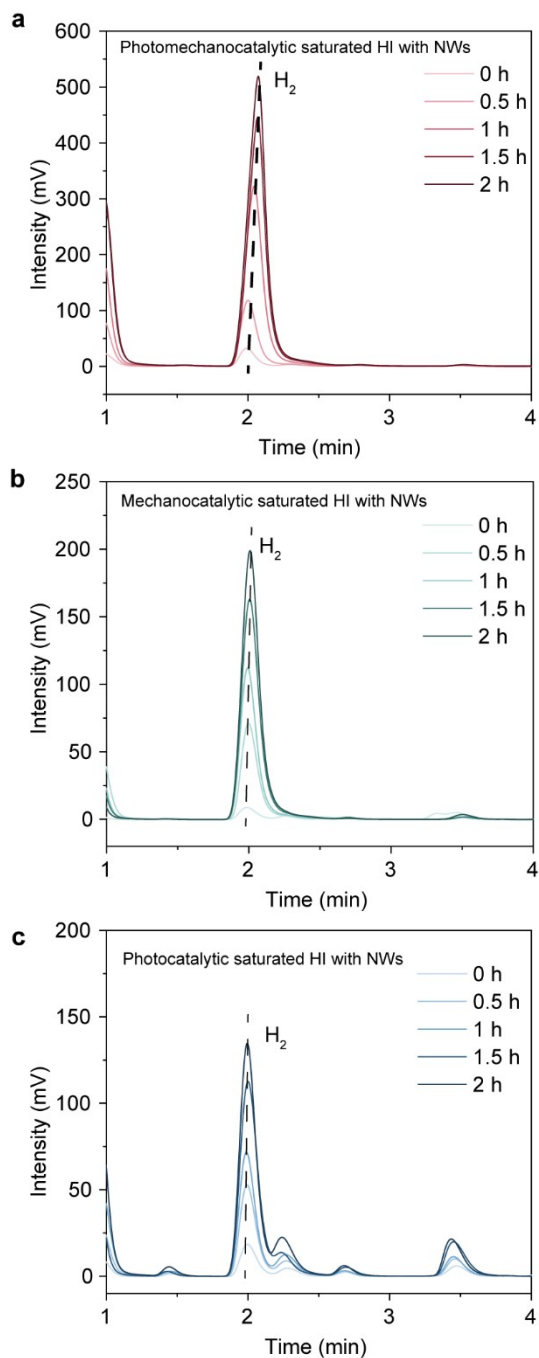

**Fig. S11** GC data for hydrogen gas production from the decomposition of saturated HI using MAPbI<sub>3</sub> NWs under photomechanocatalytic, mechanocatalytic, and photocatalytic conditions. (a) MAPbI<sub>3</sub> NWs decompose saturated HI under a photomechanocatalytic condition. (b) MAPbI<sub>3</sub> NWs decompose saturated HI under a mechanocatalytic condition. (c) MAPbI<sub>3</sub> NWs decompose saturated HI under a photocatalytic condition.

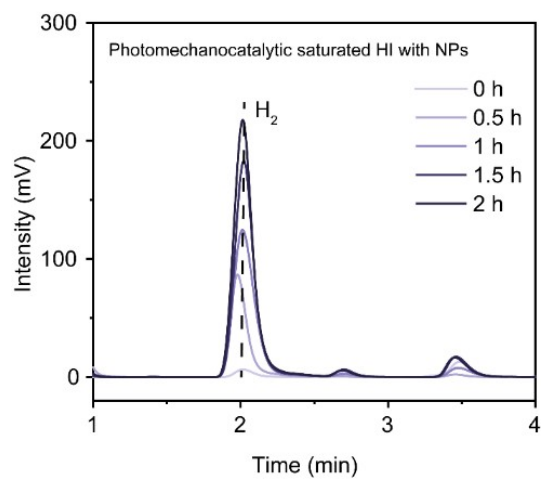

**Fig. S12** MAPbI<sub>3</sub> NPs decompose saturated HI under a photomechanocatalytic condition.

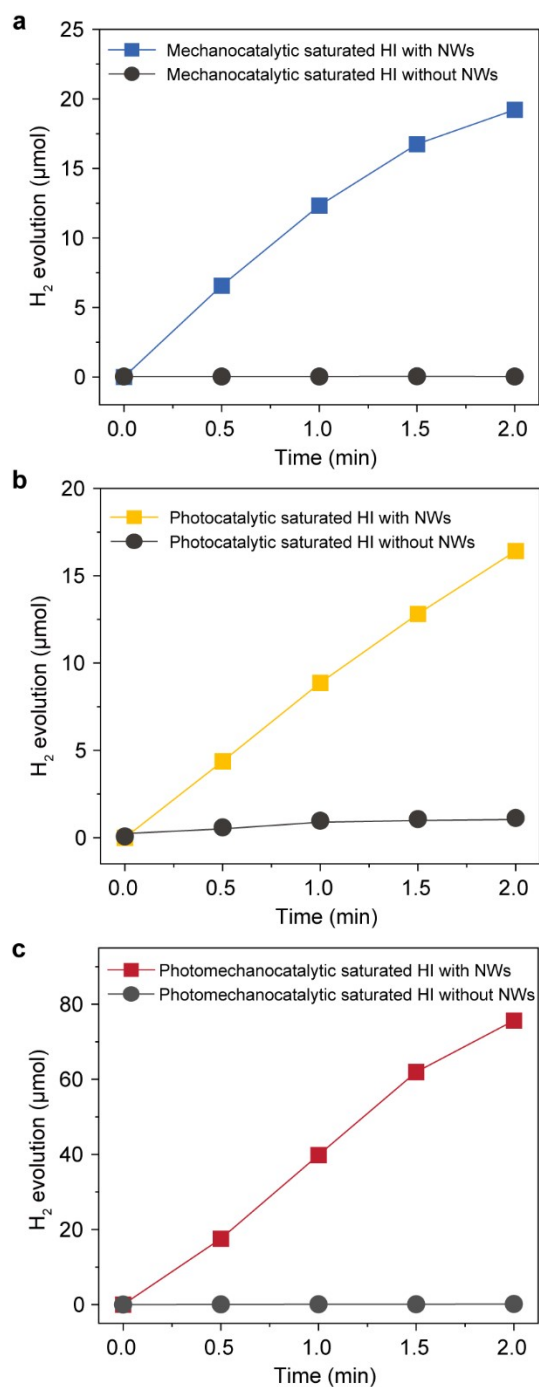

**Fig. S13** HI splitting by the NWs in a saturated HI solution at various conditions. (a) Mechanocatalytic HI splitting reaction of the saturated solution in the presence and absence of MAPbI<sub>3</sub> NWs. (b) Photocatalytic HI splitting reaction of the saturated solution in the presence and absence of MAPbI<sub>3</sub> NWs. (c) Photomechanocatalytic HI splitting reaction of the saturated solution in the presence and absence of MAPbI<sub>3</sub> NWs.

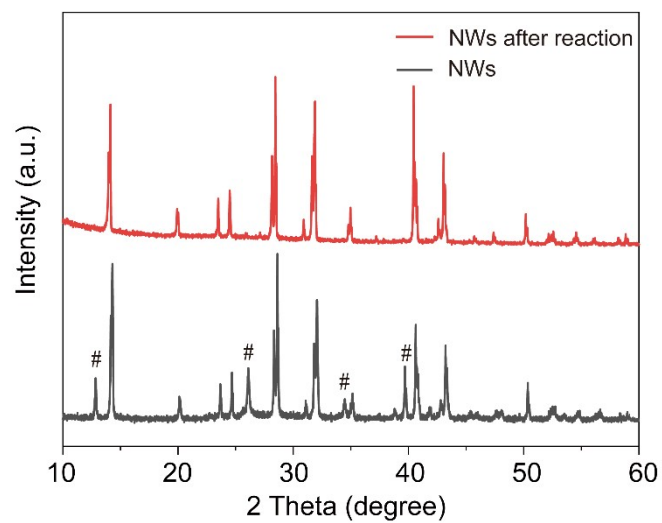

**Fig. S14** XRD patterns for MAPbI<sub>3</sub> NWs before and after the catalytic reaction.

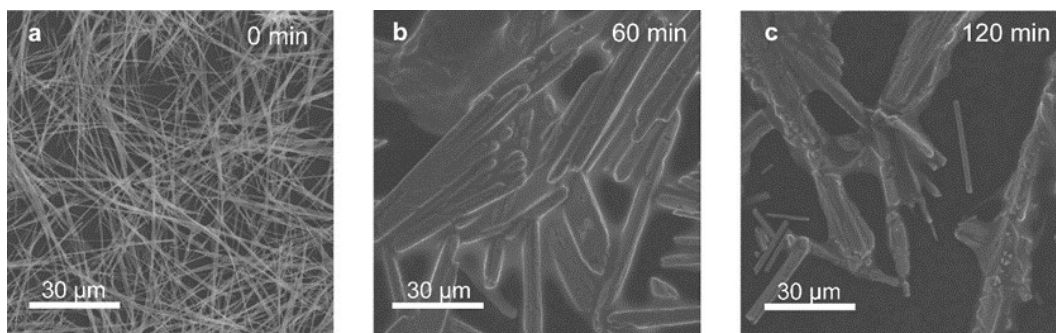

**Fig. S15** Structural characterization of NWs before and after the catalytic reaction. (a) SEM image of MAPbI<sub>3</sub> NWs at 0 min. (b) SEM image of MAPbI<sub>3</sub> NWs after 60 min of catalytic reaction. (c) SEM of MAPbI<sub>3</sub> NWs at 120 min of catalytic reaction.

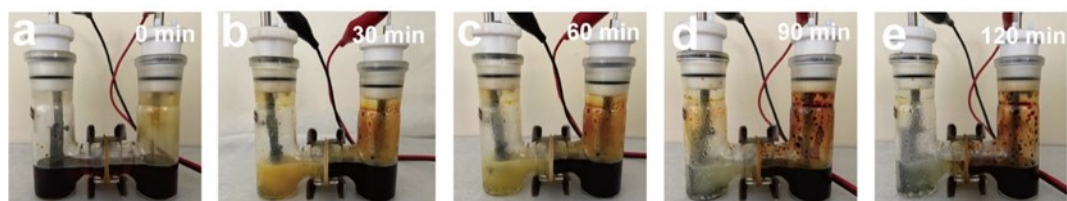

**Fig. S16** Photos for the electrical reduction process of saturated HI.

**Table. S1** A summary of previously reported typical catalysts and their performance in the hydrogen evolution reaction from HI decomposition.

| Catalyst                                                               | Light source                                         | Precious metal | Catalytic Mechanism | Activity [H <sub>2</sub> μmol g <sup>-1</sup> h <sup>-1</sup> ] | Year [Reference]   |
|------------------------------------------------------------------------|------------------------------------------------------|----------------|---------------------|-----------------------------------------------------------------|--------------------|
| MAPbI <sub>3</sub> NWs                                                 | 300 W Xe lamp (λ ≥ 420 nm)                           | ---            | Photo-mechano-      | 756.5                                                           | This work          |
| MAPbI <sub>3</sub> /Pt                                                 | Solar simulator (λ > 475nm)                          | Pt             | Photo-              | 57.0                                                            | 2016 <sup>1</sup>  |
| MAPbI <sub>3</sub> /Pt/TiO <sub>2</sub>                                | 300 W Xe lamp (200 mW cm <sup>-2</sup> , λ ≥ 420 nm) | Pt             | Photo-              | 5293                                                            | 2018 <sup>3</sup>  |
| MAPbBr <sub>3-x</sub> I <sub>x</sub> /Pt                               | 300 W Xe lamp (λ ≥ 420 nm)                           | Pt             | Photo-              | 2604                                                            | 2018 <sup>4</sup>  |
| MAPbI <sub>3</sub> /rGO                                                | 300 W Xe lamp (120 mW cm <sup>-2</sup> , λ ≥ 420 nm) | ---            | Photo-              | 939                                                             | 2018 <sup>5</sup>  |
| MABi <sub>2</sub> I <sub>9</sub> /Pt                                   | 300 W Xe lamp (λ ≥ 400 nm)                           | Pt             | Photo-              | 169                                                             | 2019 <sup>6</sup>  |
| MAPbI <sub>3</sub> /black phosphorus                                   | Xe lamp (300 mW cm <sup>-2</sup> , λ ≥ 420 nm)       | ---            | Photo-              | 3742                                                            | 2019 <sup>7</sup>  |
| Pt/Ta <sub>2</sub> O <sub>5</sub> /MAPbBr <sub>3</sub> /PEDOT:PSS      | 300 W Xe lamp (150 mW cm <sup>-2</sup> , λ ≥ 420 nm) | Pt             | Photo-              | 619                                                             | 2019 <sup>8</sup>  |
| MAPbI <sub>3</sub>                                                     | 500 W Xe lamp (100 mW cm <sup>-2</sup> )             | ---            | Photo-              | 68.4                                                            | 2019 <sup>9</sup>  |
| MAPbI <sub>3</sub>                                                     | 500 W Xe lamp (100 mW cm <sup>-2</sup> )             | ---            | Piezo-              | 44.2                                                            | 2019 <sup>9</sup>  |
| MAPbI <sub>3</sub>                                                     | 500 W Xe lamp (100 mW cm <sup>-2</sup> )             | ---            | Piezophoto-         | 460.7                                                           | 2019 <sup>9</sup>  |
| MAPbI <sub>3</sub> /Ni <sub>3</sub> C                                  | 300 W Xe lamp (λ > 420nm)                            | ---            | Photo               | 2362                                                            | 2019 <sup>10</sup> |
| MAPb(Br <sub>0.1</sub> I <sub>0.9</sub> ) <sub>3</sub> /Pt             | 300 W Xe lamp (λ ≥ 420 nm)                           | Pt             | Photo-              | 3348                                                            | 2019 <sup>11</sup> |
| MAPbI <sub>3</sub> /CoP                                                | 150 W Xe lamp (λ > 420nm)                            | ---            | Photo-              | 785.9                                                           | 2020 <sup>12</sup> |
| Cs <sub>3</sub> Bi <sub>2x</sub> Sb <sub>2-2x</sub> I <sub>9</sub> /Pt | Solar simulator                                      | Pt             | Photo-              | 926                                                             | 2020 <sup>13</sup> |
| MAPbI <sub>3</sub> /Pt/C                                               | 10 W LED lamp (380 ≤ λ ≤ 780 nm)                     | ---            | Photo-              | 685                                                             | 2020 <sup>14</sup> |
| Cs <sub>3</sub> Bi <sub>2</sub> I <sub>9</sub>                         | 450 W Xe lamp (150 mW cm <sup>-2</sup> )             | ---            | Photo-              | 225                                                             | 2022 <sup>15</sup> |

## References

1. S. Park, W. J. Chang, C. W. Lee, S. Park, H.-Y. Ahn and K. T. Nam, Photocatalytic hydrogen generation from hydriodic acid using methylammonium lead iodide in dynamic equilibrium with aqueous solution, *Nat. Energy*, 2016, **2**, 16185.
2. W. Guan, Y. Li, Q. Zhong, H. Liu, J. Chen, H. Hu, K. Lv, J. Gong, Y. Xu, Z. Kang, M. Cao and Q. Zhang, Fabricating MAPbI<sub>3</sub>/MoS<sub>2</sub> composites for improved photocatalytic performance, *Nano Lett.*, 2021, **21**, 597-604.
3. X. Wang, H. Wang, H. Zhang, W. Yu, X. Wang, Y. Zhao, X. Zong and C. Li, Dynamic interaction between methylammonium lead iodide and TiO<sub>2</sub> nanocrystals leads to enhanced photocatalytic H<sub>2</sub> evolution from HI splitting, *ACS Energy Lett.*, 2018, **3**, 1159-1164.
4. Y. Wu, P. Wang, Z. Guan, J. Liu, Z. Wang, Z. Zheng, S. Jin, Y. Dai, M.-H. Whangbo and B. Huang, Enhancing the photocatalytic hydrogen evolution activity of mixed-halide perovskite CH<sub>3</sub>NH<sub>3</sub>PbBr<sub>3-x</sub>I<sub>x</sub> achieved by bandgap funneling of charge carriers, *ACS Catal.*, 2018, **8**, 10349-10357.
5. Y. Wu, P. Wang, X. Zhu, Q. Zhang, Z. Wang, Y. Liu, G. Zou, Y. Dai, M.-H. Whangbo and B. Huang, Composite of CH<sub>3</sub>NH<sub>3</sub>PbI<sub>3</sub> with reduced graphene oxide as a highly efficient and stable visible-light photocatalyst for hydrogen evolution in aqueous HI solution, *Adv. Mater.*, 2018, **30**, 1704342.
6. Y. Guo, G. Liu, Z. Li, Y. Lou, J. Chen and Y. Zhao, Stable lead-free (CH<sub>3</sub>NH<sub>3</sub>)<sub>3</sub>Bi<sub>2</sub>I<sub>9</sub> perovskite for photocatalytic hydrogen generation, *ACS Sustainable Chem. Eng.*, 2019, **7**, 15080-15085.
7. R. Li, X. Li, J. Wu, X. Lv, Y.-Z. Zheng, Z. Zhao, X. Ding, X. Tao and J.-F. Chen, Few-layer black phosphorus-on-MAPbI<sub>3</sub> for superb visible-light photocatalytic hydrogen evolution from HI splitting, *Appl. Catal., B*, 2019, **259**, 118075.
8. H. Wang, X. Wang, R. Chen, H. Zhang, X. Wang, J. Wang, J. Zhang, L. Mu, K. Wu, F. Fan, X. Zong and C. Li, Promoting photocatalytic H<sub>2</sub> evolution on organic-inorganic hybrid perovskite nanocrystals by simultaneous dual-charge transportation modulation, *ACS Energy Lett.*, 2019, **4**, 40-47.
9. M. Wang, Y. Zuo, J. Wang, Y. Wang, X. Shen, B. Qiu, L. Cai, F. Zhou, S. P. Lau and Y. Chai, Remarkably enhanced hydrogen generation of organolead halide perovskites via piezocatalysis and photocatalysis, *Adv. Energy Mater.*, 2019, **9**, 1901801.
10. Z. Zhao, J. Wu, Y.-Z. Zheng, N. Li, X. Li and X. Tao, Ni<sub>3</sub>C-decorated MAPbI<sub>3</sub> as visible-light photocatalyst for H<sub>2</sub> evolution from HI splitting, *ACS Catal.*, 2019, **9**, 8144-8152.



11. Z. Zhao, J. Wu, Y.-Z. Zheng, N. Li, X. Li, Z. Ye, S. Lu, X. Tao and C. Chen, Stable hybrid perovskite MAPb(I<sub>1-x</sub>Br<sub>x</sub>)<sub>3</sub> for photocatalytic hydrogen evolution, *Appl. Catal., B*, 2019, **253**, 41-48.
12. C. Cai, Y. Teng, J.-H. Wu, J.-Y. Li, H.-Y. Chen, J.-H. Chen and D.-B. Kuang, In situ photosynthesis of an MAPbI<sub>3</sub>/CoP hybrid heterojunction for efficient photocatalytic hydrogen evolution, *Adv. Funct. Mater.*, 2020, **30**, 2001478.
13. G. Chen, P. Wang, Y. Wu, Q. Zhang, Q. Wu, Z. Wang, Z. Zheng, Y. Liu, Y. Dai and B. Huang, Lead-free halide perovskite Cs<sub>3</sub>Bi<sub>2x</sub>Sb<sub>2-2x</sub>I<sub>9</sub> (x ≈ 0.3) possessing the photocatalytic activity for hydrogen evolution comparable to that of (CH<sub>3</sub>NH<sub>3</sub>)PbI<sub>3</sub>, *Adv. Mater.*, 2020, **32**, 2001344.
14. F. Wang, X. Liu, Z. Zhang and S. Min, A noble-metal-free MoS<sub>2</sub> nanosheet-coupled MAPbI<sub>3</sub> photocatalyst for efficient and stable visible-light-driven hydrogen evolution, *Chem. Commun.*, 2020, **56**, 3281-3284.
15. S. P. Chaudhary, S. Bhattacharjee, V. Hazra, S. Shyamal, N. Pradhan and S. Bhattacharyya, Cs<sub>3</sub>Bi<sub>2</sub>I<sub>9</sub> nanodiscs with phase and Bi<sub>(III)</sub> state stability under reductive potential or illumination for H<sub>2</sub> generation from diluted aqueous HI, *Nanoscale*, 2022, **14**, 4281-4291.
16. T. Zhang, Y. Cai, Y. Lou and J. Chen, 1T-2H MoSe<sub>2</sub> modified MAPbI<sub>3</sub> for effective photocatalytic hydrogen evolution, *J. Alloys Compd.*, 2022, **893**, 162329.
